# Supplementary material for: Integration of Transcriptomics and Metabolomics Reveals the Antitumor Mechanism Underlying Shikonin in Colon Cancer
Source: PubMed Central journal article supplement (PMC7689381; doi:10.3389/fphar.2020.544647), 2020-10-22
Supplement: Image1_v1.pdf [file Image1_v1.pdf]

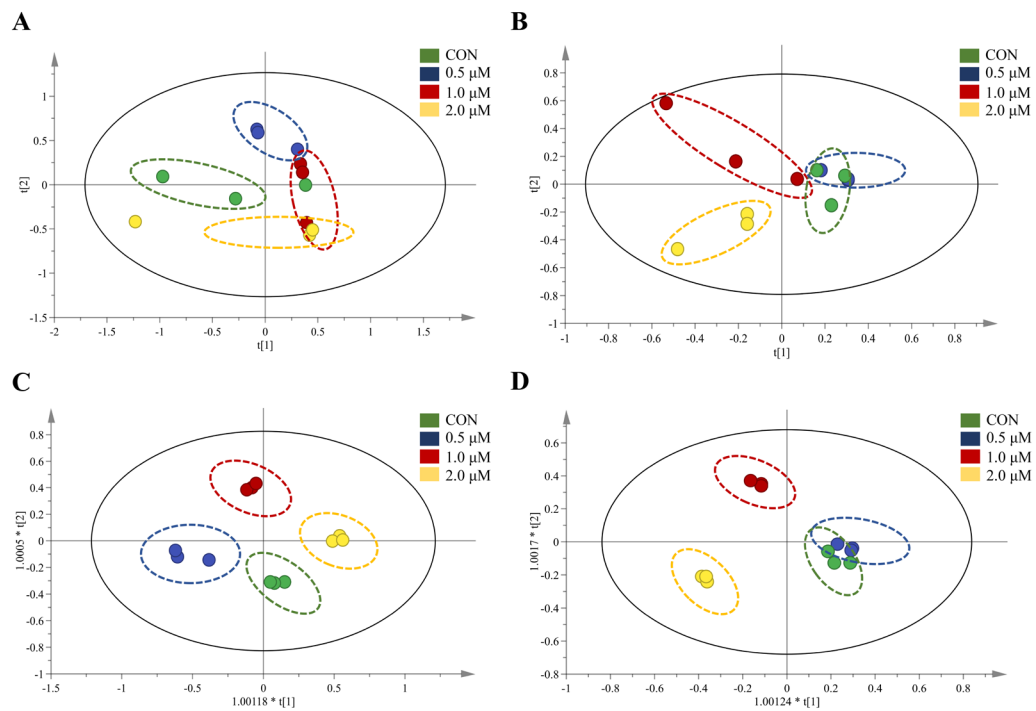

Figure S1. Scores plots of PCA and OPLS-DA from cellular metabolomics. (A) Scores plot of PCA in positive mode. (B) Scores plot of PCA in negative mode. (C) Scores plot of OPLS-DA in positive mode. (D) Scores plot of OPLS-DA in negative mode.
